# Supplementary material for: Urinary Extracellular Vesicles and Their miRNA Cargo in Patients with Fabry Nephropathy
Source: MDPI journal article supplement (doi:10.3390/genes12071057), 2021-07-09
Supplement: s1 [file s1]

## Supplementary Materials

**Table S1.** Spearman's correlation analysis of uEVs characteristics and clinical parameters in FD patients without nephropathy (n = 9).

| Parameter | Concentration |                   | Mean Diameter |                | Modal Diameter |                | Median Diameter |                |
|-----------|---------------|-------------------|---------------|----------------|----------------|----------------|-----------------|----------------|
|           | $\rho$        | <i>p</i> Value    | $\rho$        | <i>p</i> Value | $\rho$         | <i>p</i> Value | $\rho$          | <i>p</i> Value |
| UPCR      | -0.333        | 0.381             | -0.317        | 0.406          | 0.050          | 0.898          | -0.293          | 0.444          |
| UACR      | 0.491         | 0.217             | 0.335         | 0.417          | 0.311          | 0.453          | 0.355           | 0.388          |
| D-prot    | -0.100        | 0.797             | 0.452         | 0.222          | 0.368          | 0.330          | 0.483           | 0.188          |
| S-Cr      | -0.226        | 0.559             | 0.184         | 0.635          | 0.075          | 0.847          | 0.147           | 0.706          |
| U-Cr      | 0.929         | <b>&lt; 0.001</b> | 0.667         | 0.071          | 0.310          | 0.456          | 0.611           | 0.108          |
| eGFR      | -0.430        | 0.248             | -0.068        | 0.863          | -0.135         | 0.729          | -0.144          | 0.712          |
| GFR slope | -0.100        | 0.798             | -0.067        | 0.865          | 0.517          | 0.154          | 0.075           | 0.847          |

UPCR, urinary protein-to-creatinine ratio; UACR, urinary albumin-to-creatinine ratio; D-prot, daily proteinuria; S-Cr, serum creatinine; U-Cr, urinary creatinine; eGFR, estimated glomerular filtration rate; GFR, glomerular filtration rate.

**Table S2.** Spearman's correlation analysis of uEVs characteristics and clinical parameters in FD patients with nephropathy (n = 10).

| Parameter | Concentration |                | Mean Diameter |                | Modal Diameter |                | Median Diameter |                |
|-----------|---------------|----------------|---------------|----------------|----------------|----------------|-----------------|----------------|
|           | $\rho$        | <i>p</i> Value | $\rho$        | <i>p</i> Value | $\rho$         | <i>p</i> Value | $\rho$          | <i>p</i> Value |
| UPCR      | -0.091        | 0.803          | 0.042         | 0.907          | 0.273          | 0.446          | 0.139           | 0.701          |
| UACR      | -0.050        | 0.898          | 0.317         | 0.406          | 0.333          | 0.381          | 0.333           | 0.381          |
| D-prot    | -0.146        | 0.668          | 0.160         | 0.639          | 0.205          | 0.544          | 0.251           | 0.456          |
| S-Cr      | -0.518        | 0.102          | -0.600        | 0.051          | -0.455         | 0.160          | -0.555          | 0.077          |
| U-Cr      | 0.636         | <b>0.035</b>   | 0.509         | 0.110          | 0.282          | 0.401          | 0.382           | 0.247          |
| eGFR      | 0.564         | 0.071          | 0.627         | <b>0.039</b>   | 0.355          | 0.285          | 0.582           | 0.060          |
| GFR slope | 0.473         | 0.142          | 0.600         | 0.051          | 0.245          | 0.467          | 0.582           | 0.060          |
| Duration  | 0.037         | 0.915          | -0.284        | 0.397          | -0.073         | 0.830          | -0.220          | 0.515          |

UPCR, urinary protein-to-creatinine ratio; UACR, urinary albumin-to-creatinine ratio; D-prot, daily proteinuria; S-Cr, serum creatinine; U-Cr, urinary creatinine; eGFR, estimated glomerular filtration rate; GFR, glomerular filtration rate; duration, duration of nephropathy.

**Table S3.** Medians of concentration, mean, modal, and median diameter in patients (a) without (n = 8) and (b) with Fabry nephropathy (n = 10) in 5-year period.

| (a) Without Nephropathy | Parameter                             | Median (25–75%)     |                     | <i>p</i> Value |
|-------------------------|---------------------------------------|---------------------|---------------------|----------------|
|                         |                                       | 5 Years Ago         | Last Follow-up      |                |
|                         | Concentration ( $\times 10^{11}$ /mL) | 3.22 (1.44–6.64)    | 3.66 (1.39–14.0)    | 0.889          |
| (b) With Nephropathy    | Mean Diameter (nm)                    | 158.8 (151.8–186.8) | 169.1 (141.3–173.2) | 1.000          |
|                         | Modal Diameter (nm)                   | 125.2 (112.1–132.5) | 117.2 (108.7–151.7) | 0.889          |
|                         | Median Diameter (nm)                  | 143.2 (132.6–164.6) | 153.5 (126.3–158.1) | 0.779          |
|                         | Parameter                             | Median (25–75%)     |                     | <i>p</i> Value |
|                         |                                       | 5 Years Ago         | Last Follow-up      |                |
| (b) With Nephropathy    | Concentration ( $\times 10^{11}$ /mL) | 6.53 (2.23–9.99)    | 1.75 (1.17–6.89)    | 0.093          |
|                         | Mean Diameter (nm)                    | 158.1 (145.3–162.2) | 156.6 (140.5–175.2) | 0.386          |
|                         | Modal Diameter (nm)                   | 119.7 (111.9–128.3) | 115.3 (94.6–132.7)  | 0.712          |
|                         | Median Diameter (nm)                  | 143.5 (131.5–152.3) | 142.3 (129.4–157.9) | 0.575          |

**Table S4.** Medians of concentration, mean, modal, and median diameter in patients (a) without (n = 6) and (b) with Fabry nephropathy (n = 8) in 10-year period.

| (a) Without Nephropathy | Parameter                              | Median (25–75%)     |                     | <i>p</i> Value |
|-------------------------|----------------------------------------|---------------------|---------------------|----------------|
|                         |                                        | 10 Years Ago        | Last Follow-up      |                |
|                         | Concentration (× 10 <sup>11</sup> /mL) | 8.84 (5.51–18.1)    | 3.66 (1.10–9.42)    | 0.463          |
|                         | Mean Diameter (nm)                     | 157.3 (147.4–171.5) | 162.9 (133.9–172.8) | 0.753          |
|                         | Modal Diameter (nm)                    | 113.7 (108.4–130.6) | 117.2 (106.3–140.2) | 0.752          |
|                         | Median Diameter (nm)                   | 139.1 (132.8–154.4) | 148.2 (120.4–156.8) | 0.753          |
| (b) With Nephropathy    | Parameter                              | Median (25–75%)     |                     | <i>p</i> Value |
|                         |                                        | 10 Years Ago        | Last Follow-up      |                |
|                         | Concentration (× 10 <sup>11</sup> /mL) | 7.21 (4.19–18.4)    | 1.95 (1.36–13.9)    | 0.123          |
|                         | Mean Diameter (nm)                     | 150.3 (142.8–157.9) | 156.6 (140.4–172.7) | 0.484          |
|                         | Modal Diameter (nm)                    | 114.0 (106.2–120.5) | 115.3 (98.9–126.9)  | 0.889          |
|                         | Median Diameter (nm)                   | 132.3 (129.3–146.0) | 142.3 (130.0–155.7) | 0.263          |

**Table S5.** Spearman's correlation analysis between expression of miRNAs and clinical parameters in FD patients without nephropathy (n = 9).

| Parameter | miR-23a-3p |                | miR-29a-3p |                | miR-30b-5p |                | miR-34a-5p |                | miR-200a-3p |                |
|-----------|------------|----------------|------------|----------------|------------|----------------|------------|----------------|-------------|----------------|
|           | <i>q</i>   | <i>p</i> Value | <i>q</i>    | <i>p</i> Value |
| UPCR      | -0.450     | 0.224          | 0.350      | 0.356          | 0.200      | 0.606          | -0.033     | 0.932          | -0.150      | 0.700          |
| UACR      | -0.335     | 0.417          | -0.192     | 0.649          | 0.036      | 0.933          | -0.120     | 0.778          | -0.563      | 0.146          |
| D-prot    | 0.050      | 0.898          | -0.218     | 0.574          | 0.360      | 0.342          | -0.050     | 0.898          | 0.109       | 0.781          |
| S-Cr      | -0.259     | 0.500          | -0.176     | 0.651          | 0.368      | 0.330          | 0.276      | 0.472          | -0.184      | 0.635          |
| U-Cr      | 0.381      | 0.352          | -0.262     | 0.531          | -0.667     | 0.071          | -0.262     | 0.531          | -0.262      | 0.531          |
| eGFR      | 0.051      | 0.897          | 0.118      | 0.762          | -0.059     | 0.880          | -0.034     | 0.931          | 0.169       | 0.664          |
| GFR slope | -0.233     | 0.546          | 0.233      | 0.546          | 0.183      | 0.637          | -0.167     | 0.668          | -0.283      | 0.460          |

UPCR, urinary protein-to-creatinine ratio; UACR, urinary albumin-to-creatinine ratio; D-prot, daily proteinuria; S-Cr, serum creatinine; U-Cr, urinary creatinine; eGFR, estimated glomerular filtration rate; GFR, glomerular filtration rate.

**Table S6.** Spearman's correlation analysis between expression of miRNAs and clinical parameters in FD patients with nephropathy (n = 10).

| Parameter | miR-23a-3p |                | miR-29a-3p |                | miR-30b-5p |                | miR-34a-5p |                | miR-200a-3p |                |
|-----------|------------|----------------|------------|----------------|------------|----------------|------------|----------------|-------------|----------------|
|           | $\rho$     | <i>p</i> Value | $\rho$      | <i>p</i> Value |
| UPCR      | -0.382     | 0.276          | 0.285      | 0.425          | 0.552      | 0.098          | -0.370     | 0.293          | 0.433       | 0.244          |
| UACR      | -0.267     | 0.488          | 0.050      | 0.898          | 0.467      | 0.205          | -0.233     | 0.546          | 0.429       | 0.289          |
| D-prot    | -0.100     | 0.769          | -0.160     | 0.639          | 0.009      | 0.979          | 0.055      | 0.873          | 0.347       | 0.327          |
| S-Cr      | 0.245      | 0.467          | -0.618     | <b>0.043</b>   | -0.545     | 0.083          | 0.418      | 0.201          | 0.006       | 0.987          |
| U-Cr      | 0.309      | 0.355          | 0.045      | 0.894          | -0.182     | 0.593          | -0.073     | 0.832          | -0.115      | 0.751          |
| eGFR      | -0.300     | 0.370          | 0.482      | 0.133          | 0.482      | 0.133          | -0.327     | 0.326          | -0.042      | 0.907          |
| GFR slope | -0.255     | 0.450          | 0.155      | 0.650          | 0.300      | 0.370          | -0.118     | 0.729          | 0.115       | 0.715          |
| Duration  | -0.266     | 0.429          | 0.624      | <b>0.040</b>   | 0.743      | <b>0.009</b>   | -0.541     | 0.085          | 0.146       | 0.688          |

UPCR, urinary protein-to-creatinine ratio; UACR, urinary albumin-to-creatinine ratio; D-prot, daily proteinuria; S-Cr, serum creatinine; U-Cr, urinary creatinine; eGFR, estimated glomerular filtration rate; GFR, glomerular filtration rate; duration, duration of nephropathy.
